# Supplementary material for: miR-4432 Targets FGFBP1 in Human Endothelial Cells
Source: MDPI journal article supplement (doi:10.3390/biology12030459), 2023-03-16
Supplement: s1 [file s1]

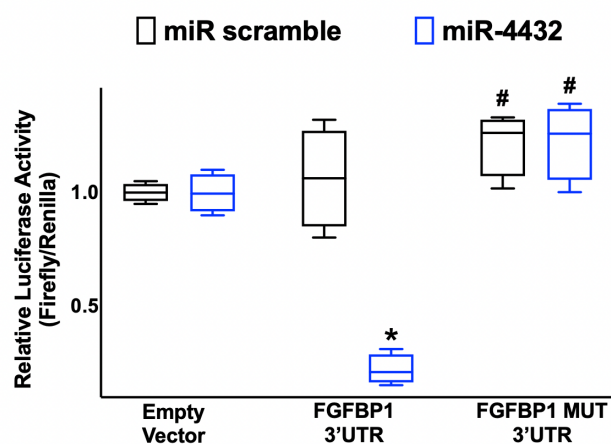

Supplementary Figure S1.

Validation of FGFBP1 targeting by miR-4432 in HUVECs.

Luciferase activity was measured 48 h after transfection, using the vector without FGFBP1 3'UTR (empty vector), the vector containing the wild-type FGFBP1 3'UTR, and the vector containing a mutated FGFBP1 3'UTR (FGFBP1 MUT); a non-targeting miRNA (miR scramble) was employed as a further control. All experiments were performed at least in triplicate; the box-and-whiskers graph indicates the medians and the 5<sup>th</sup>–95<sup>th</sup> percentiles; \*  $p < 0.01$  vs. miR scramble; #  $p < 0.05$  vs. FGFBP1 3'UTR.

---
